# Supplementary material for: Pyrene-conjugated porphyrins for efficient mesoscopic solar cells: the role of the spacer
Source: Royal Society of Chemistry journal article supplement (doi:10.1039/c4ta03435j), 2014-01-01
Supplement: c4ta03435j1.pdf [file c4ta03435j1.pdf]

## Supporting information

### Pyrene-conjugated Porphyrins for Efficient Mesoscopic Solar Cells: the role of spacer

Jianfeng Lu<sup>‡</sup><sup>[a]</sup>, Shuangshuang Liu<sup>‡</sup><sup>[a]</sup>, Hao Li<sup>[a]</sup>, Yan Shen<sup>[a]</sup>, Jie Xu<sup>[b]\*</sup>, Yibing Cheng<sup>[a,c]</sup>, and Mingkui Wang<sup>[a]</sup> \*

[a] Wuhan National Laboratory for Optoelectronics, School of Optical and Electronic Information, Huazhong University of Science and Technology, 1037 Luoyu Road, Wuhan 430074 (P. R. China), Fax: (+) 86-27-87792225, E-mail: [mingkui.wang@mail.hust.edu.cn](mailto:mingkui.wang@mail.hust.edu.cn)

[b] College of Materials Science & Engineering, Wuhan Textile University, FangZhi Road, 430073, Wuhan, P. R. China, E-mail: <mailto:xujie0@mail.ustc.edu.cn>

[c] Department of Materials Engineering, Monash University, Melbourne, Victoria, 3800, Australia

#### Table of contents:

|                                                               |       |
|---------------------------------------------------------------|-------|
| 1. Experimental section                                       | P2    |
| 1.1 Chemicals:                                                | P2    |
| 1.2 Synthesis of LW17-LW19                                    | P2-8  |
| 1.2.1 Synthesis route of LW17-LW19                            | P2-3  |
| 1.2.2 NMR and HRMS characterization of compounds              | P4-8  |
| 2. Device fabrication                                         | P8    |
| 3. Photovoltaic characterization                              | P9    |
| 4. Transient photovoltage decay (TPD) measurements            | P10   |
| 5. Spectroscopy Electrochemical characterization of LW17-LW19 | P9-11 |
| 6. The schematic energy-level diagram                         | P11   |

## 1.1 Chemicals:

All solvents and reagents, unless otherwise stated, were of analytical grade quality and used as received. Standard Schlenk techniques were employed to manipulate oxygen- and moisture-sensitive chemicals. 1-ethynylpyrene was purchased from Aldrich and used as received. 15-dibromo-10,20-bis[2,6-di(dodecyloxy)phenyl]porphyrin zinc(II) (coded as **ZnPBr<sub>2</sub>**) was synthesized according to the literature.<sup>1</sup> 4-ethynylbenzoic acid, 5-ethynylthiophene-2-carboxylic acid, 4-(5-ethynylthiophen-2-yl)benzoic acid were synthesized according to the literature.<sup>2-4</sup> Tetrahydrofuran (THF) was dried with sodium sand, and benzophenone indicator, dichloromethane (DCM), ether, triethylamine (TEA) were dried out with calcium hydride before using. Reactions were carried out under a dry nitrogen atmosphere. <sup>1</sup>H NMR and <sup>13</sup>CNMR spectra were measured on a Bruker-AF301 AT 400MHz spectrometer. High resolution mass spectra (HRMS) were measured with a Bruker micro TOF mass spectrometer.

## 1.2 Synthesis of LW17-LW19

**Synthesis of 5-bromo-15-(1-pyrene)ethynyl-10,20-bis[2,6-di(dodecyloxy) phenyl]porphinato zinc(II) (Por-1).** Compound **Por-1** was prepared under modified conditions of literature procedure.<sup>1</sup> Pd(PPh<sub>3</sub>)<sub>4</sub> (11.6 mg, 0.01 mmol) and CuI (1.9 mg, 0.01 mmol) was added into a solution of **ZnPBr<sub>2</sub>** (149 mg, 0.1 mmol) and 1-ethynylpyrene (20 mg, 0.09 mmol) in fresh distilled THF (70.0 mL) and anhydrous TEA (6 mL) under N<sub>2</sub>. The reaction was stirred at 45 °C for 18 h. The progress of the reaction was monitored with TLC. The solvent was removed under vacuum. The residue was purified on silica chromatograph using THF/hexane = 1/20 as eluent. The product was re-crystallized from CH<sub>2</sub>Cl<sub>2</sub>/MeOH to give green solid of **Por-1** (62 mg, 35%). <sup>1</sup>H NMR (CDCl<sub>3</sub>/pyridine-d<sub>5</sub>) δ 9.96 (d, J = 4.87 Hz, 1H), 9.65 (d, J = 4.87 Hz, 2H), 9.33 (d, J = 9.13 Hz, 1H), 9.02 (d, J = 5.2 Hz, 2H), 8.91 (d, J = 4.87 Hz, 2H), 8.73 (d, J = 1.3 Hz, 2H), 8.05 (t, J = 20.6 Hz, 2H), 7.75 (t, J = 8.85 Hz, 2H), 7.04 (t, J = 9.0 Hz, 4H), 3.84 (t, J = 13.2 Hz, 8H), 1.21-1.04(m, 26H), 0.98-0.88(m, 22H), 0.81(t, J=7.3Hz, 12H), 0.78-0.71(br, 8H), 0.61-0.53 (br, 16H), 0.47-0.40(br, 8H). MS (APCI) m/z: calcd for 1566.33; found 1566.1.

**Synthesis of compound LW17 porphyrins.** **LW17** was prepared under modified conditions of literature procedure.<sup>1</sup> Pd(PPh<sub>3</sub>)<sub>4</sub> (11.6 mg, 0.01 mmol) and CuI (1.9 mg, 0.01 mmol) was added into a solution of **Por-1** (157 mg, 0.1 mmol) and 4-ethynylbenzoic acid (45 mg, 0.3 mmol) in fresh distilled THF (70.0 mL) and anhydrous TEA (6 mL) under N<sub>2</sub>. The reaction was stirred at 50 °C for 12 h. The progress of the reaction was monitored with TLC. The solvent was removed under vacuum. The residue was purified on silica chromatograph using DCM/MeOH= 20/1 as eluent. The product was re-crystallized from CH<sub>2</sub>Cl<sub>2</sub>/MeOH to give green solid of **LW17** (127 mg, 78%). <sup>1</sup>H NMR (CDCl<sub>3</sub>/pyridine-d<sub>5</sub>) δ 9.84 (d, J = 3.89 Hz, 2H), 9.61 (d, J = 4.87 Hz, 2H), 9.31 (d, J = 9.13 Hz, 1H),

9.02 (d, J = 5.2 Hz, 2H), 8.91 (d, J = 4.38 Hz, 2H), 8.86 (d, J = 1.3 Hz, 2H), 8.67 (d, J = 8.7 Hz, 2H), 8.35 (t, J = 8.6 Hz, 1H), 8.30 (m, 4H), 8.25 (t, J = 7.3 Hz, 1H), 7.70 (t, J = 9.2 Hz, 2H), 7.04 (d, J = 8.7 Hz, 4H), 3.88 (t, J = 13.2 Hz, 8H), 1.21-1.04(m, 26H), 0.98-0.88(m, 22H), 0.81(t, J=7.3Hz, 12H), 0.78-0.71(br, 8H), 0.61-0.53 (br, 16H), 0.47-0.40(br, 8H). <sup>13</sup>HNMR (CDCl<sub>3</sub>/pyridine-d<sub>5</sub>) 160.0, 151.6, 151.5, 150.6, 149.7, 135.8, 132.0, 131.7, 131.4, 131.3, 130.9, 130.4, 130.2, 130.0, 129.7, 129.6, 128.4, 127.9, 127.4, 126.2, 125.5, 125.4, 124.9, 124.6, 123.4, 121.3, 119.7, 115.3, 105.1, 100.2, 98.8, 97.0, 94.8, 68.6, 31.8, 29.5, 29.4, 29.3, 29.2, 29.1, 28.7, 25.3, 22.6, 14.1. MS (APCI) m/z: calcd for 1628.9125; found 1628.9161. Elemental analysis calcd (%) for C<sub>107</sub>H<sub>128</sub>N<sub>4</sub>O<sub>6</sub>Zn: C 78.77, H 7.91, N 3.43; found C 78.57, H 7.96, N 3.45.

**Synthesis of LW18 porphyrins.** The product was re-crystallized from CH<sub>2</sub>Cl<sub>2</sub>/MeOH to give green solid of **LW18** (83%). <sup>1</sup>H NMR (CDCl<sub>3</sub>/pyridine-d<sub>5</sub>) δ 9.84 (d, J = 3.89 Hz, 2H), 9.51 (d, J = 4.87 Hz, 2H), 9.30 (d, J = 8.13 Hz, 1H), 8.91 (d, J = 5.2 Hz, 2H), 8.84 (d, J = 4.38 Hz, 2H), 8.67 (d, J = 7.5 Hz, 1H), 8.35 (t, J = 8.6 Hz, 1H), 8.30 (t, J = 7.3 Hz, 2H), 8.24 (d, J = 7.5 Hz, 1H), 8.14 (s, 2H), 8.07 (d, J = 14.0 Hz, 1H), 7.71 (t, J = 9.2 Hz, 2H), 7.65 (s, 1H), 7.57 (s, 1H), 7.04 (d, J = 8.7 Hz, 4H), 3.89 (t, J = 13.2 Hz, 8H), 1.21-1.04(m, 26H), 0.98-0.88(m, 22H), 0.81(t, J=7.3Hz, 12H), 0.78-0.71(br, 8H), 0.61-0.53 (br, 16H), 0.47-0.40(br, 8H). <sup>13</sup>HNMR (CDCl<sub>3</sub>/pyridine-d<sub>5</sub>) 160.0, 151.5, 151.4, 150.6, 150.7, 149.7, 135.7, 132.1, 131.9, 131.7, 131.5, 131.3, 131.0, 130.4, 130.1, 129.7, 129.6, 128.4, 127.9, 127.4, 126.2, 125.5, 125.4, 125.0, 124.8, 124.6, 123.5, 121.3, 119.6, 115.4, 105.1, 100.2, 68.6, 31.8, 29.5, 29.4, 29.3, 29.2, 29.1, 28.7, 25.3, 22.6, 14.1. MS (APCI) m/z: calcd for 1634.8690; found 1634.8670. elemental analysis calcd (%) for C<sub>105</sub>H<sub>126</sub>N<sub>4</sub>O<sub>6</sub>SZn: C 77.01, H 7.76, N 3.42; found C 76.97, H 7.77, N 3.42.

**Synthesis of LW19 porphyrins.** The product was re-crystallized from CH<sub>2</sub>Cl<sub>2</sub>/MeOH to give brown-green solid of **LW19** (85%). δ 9.83 (d, J = 3.89 Hz, 2H), 9.54 (d, J = 4.87 Hz, 2H), 9.31 (d, J = 9.13 Hz, 1H), 8.91 (d, J = 4.38 Hz, 2H), 8.83 (d, J = 1.3 Hz, 2H), 8.66 (d, J = 8.7 Hz, 2H), 8.35 (d, J = 7.7 Hz, 1H), 8.30 (t, J = 15.0 Hz, 2H), 8.24 (d, J = 7.3 Hz, 1H), 8.20 (d, J = 7.3 Hz, 2H), 8.05 (t, J = 7.3 Hz, 2H), 7.80 (t, J = 9.2 Hz, 2H), 7.72 (t, J = 9.2 Hz, 2H), 7.6 (s, 1H), 7.5 (s, 1H), 7.04 (d, J = 8.7 Hz, 4H), 3.89 (t, J = 13.2 Hz, 8H), 1.21-1.04(m, 26H), 0.98-0.88(m, 22H), 0.81(t, J=7.3Hz, 12H), 0.78-0.71(br, 8H), 0.61-0.53 (br, 16H), 0.47-0.40(br, 8H). <sup>13</sup>HNMR (CDCl<sub>3</sub>/pyridine-d<sub>5</sub>) 160.0, 149.8, 135.7, 132.1, 131.7, 131.6, 131.5, 131.3, 131.0, 130.4, 130.1, 129.7, 129.6, 128.4, 127.9, 127.4, 126.2, 125.5, 125.4, 125.0, 124.8, 124.6, 123.5, 121.3, 119.6, 115.4, 105.1, 100.2, 68.6, 31.8, 29.5, 29.4, 29.3, 29.2, 29.1, 28.7, 25.3, 22.6, 14.1. MS (APCI) m/z: calcd for 1710.9003; found 1710.8832. elemental analysis calcd (%) for C<sub>111</sub>H<sub>130</sub>N<sub>4</sub>O<sub>6</sub>SZn: C 77.80, H 7.65, N 3.27; found C 77.67, H 7.66, N, 3.26.

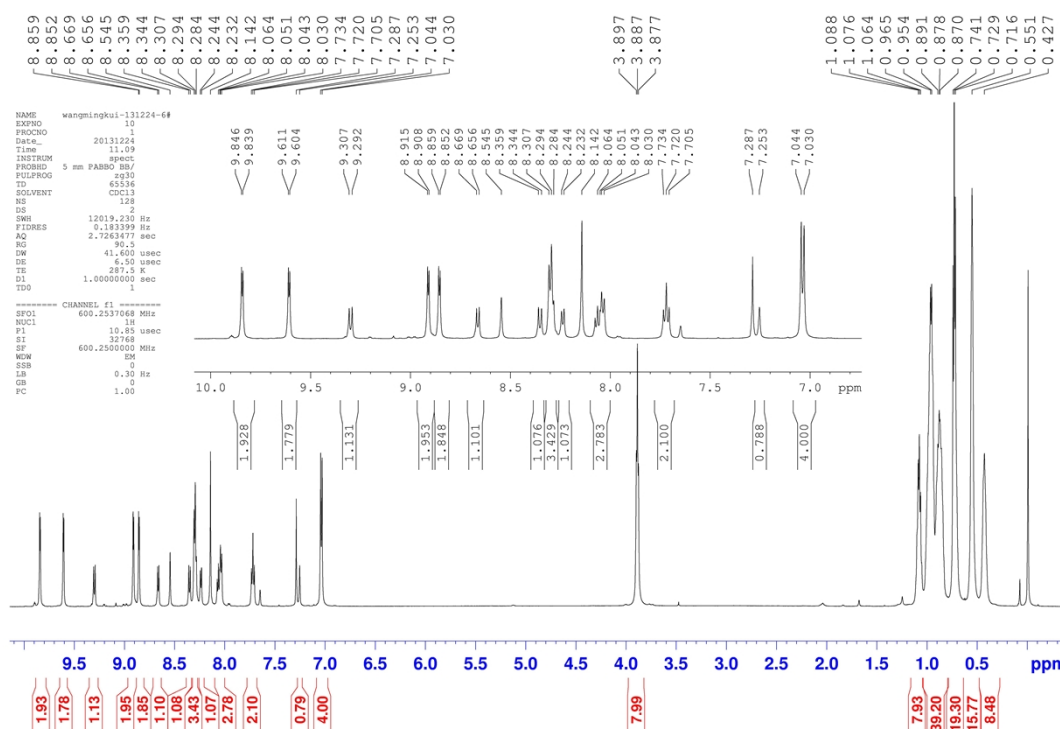

**Fig. S1.**  $^1\text{H}$  NMR spectrum of LW17 porphyrin (400 MHz,  $\text{CDCl}_3/\text{pyridine-d}_5$ , 298 K).

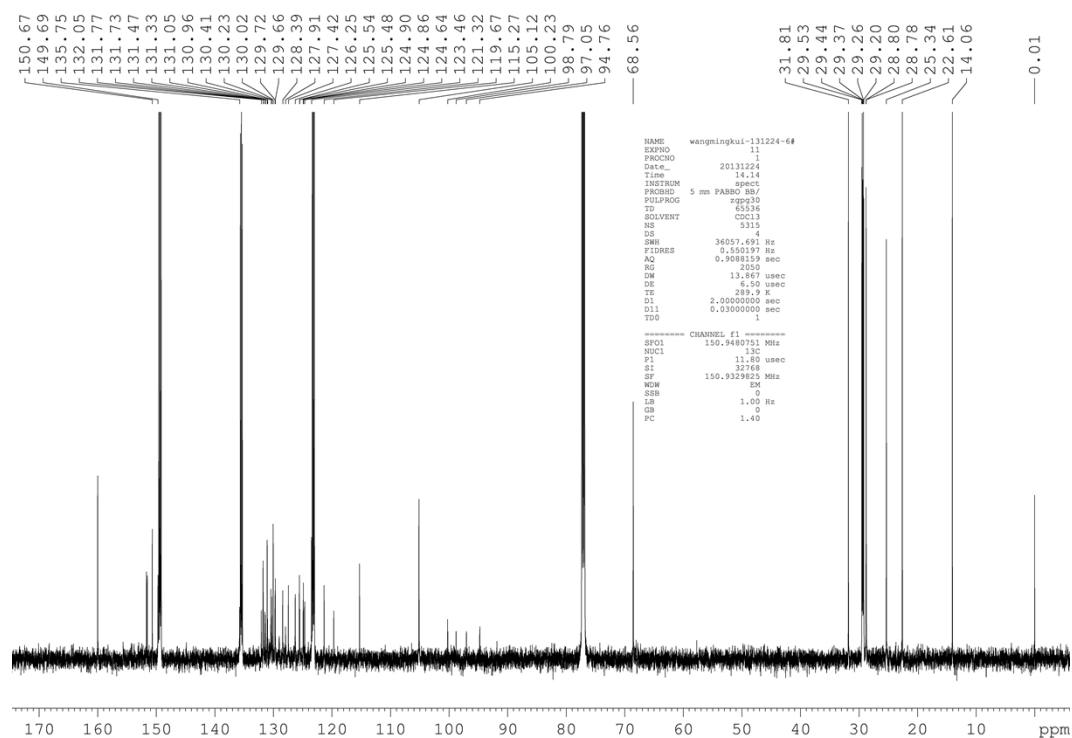

**Fig. S2.**  $^{13}\text{C}$  NMR spectrum of LW17 porphyrin (400 MHz,  $\text{CDCl}_3/\text{pyridine-d}_5$ , 298 K).

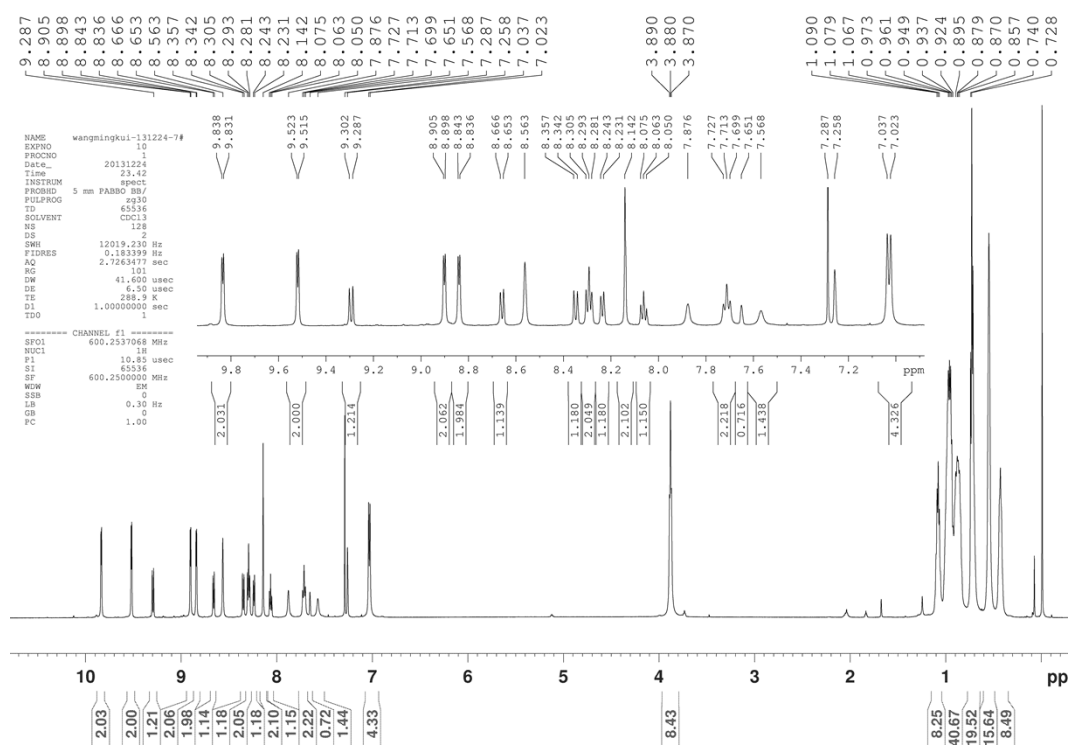

**Fig. S3.**  $^1\text{H}$  NMR spectrum of LW18 porphyrin (400 MHz,  $\text{CDCl}_3/\text{pyridine-d}_5$ , 298 K).

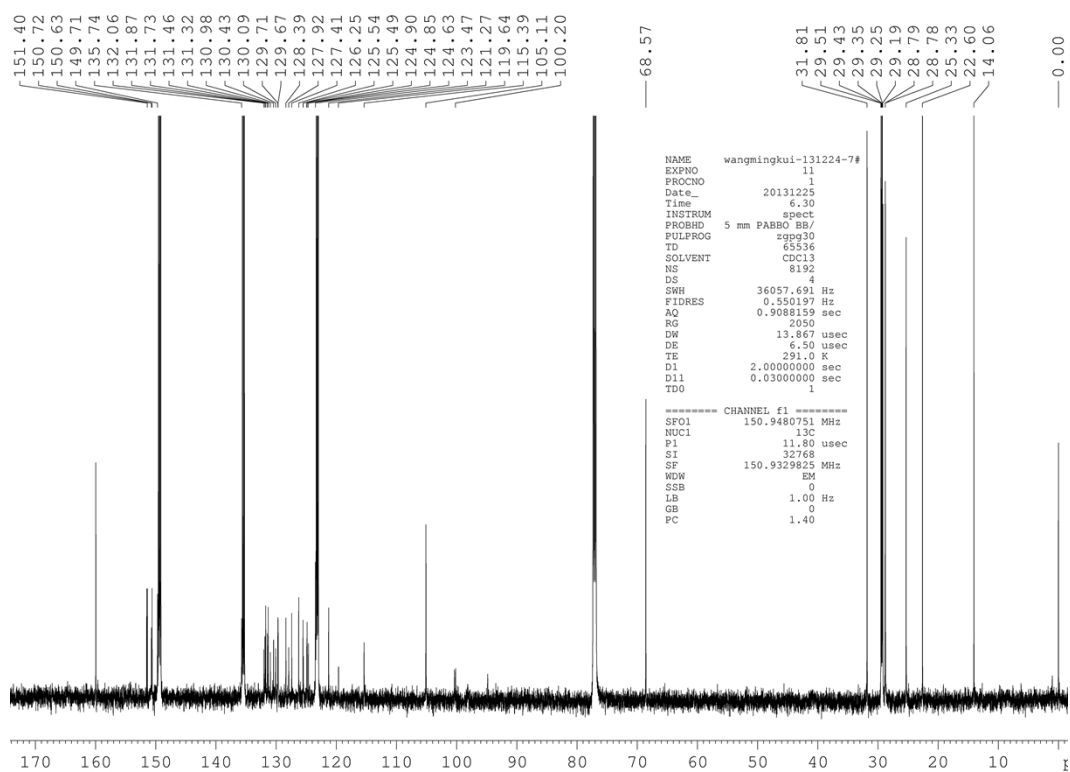

**Fig. S4.**  $^{13}\text{C}$  NMR spectrum of LW18 porphyrin (400 MHz,  $\text{CDCl}_3/\text{pyridine-d}_5$ , 298 K).

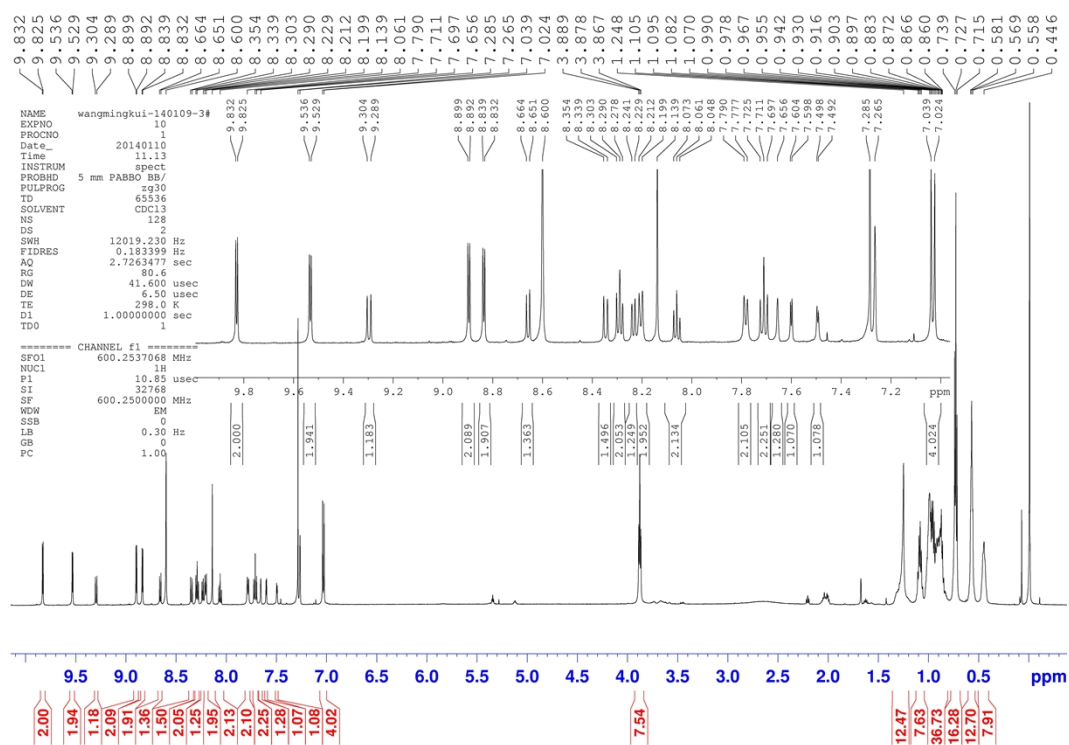

**Fig. S5.**  $^1\text{H}$  NMR spectrum of LW19 porphyrin (400 MHz,  $\text{CDCl}_3/\text{pyridine-d}_5$ , 298 K).

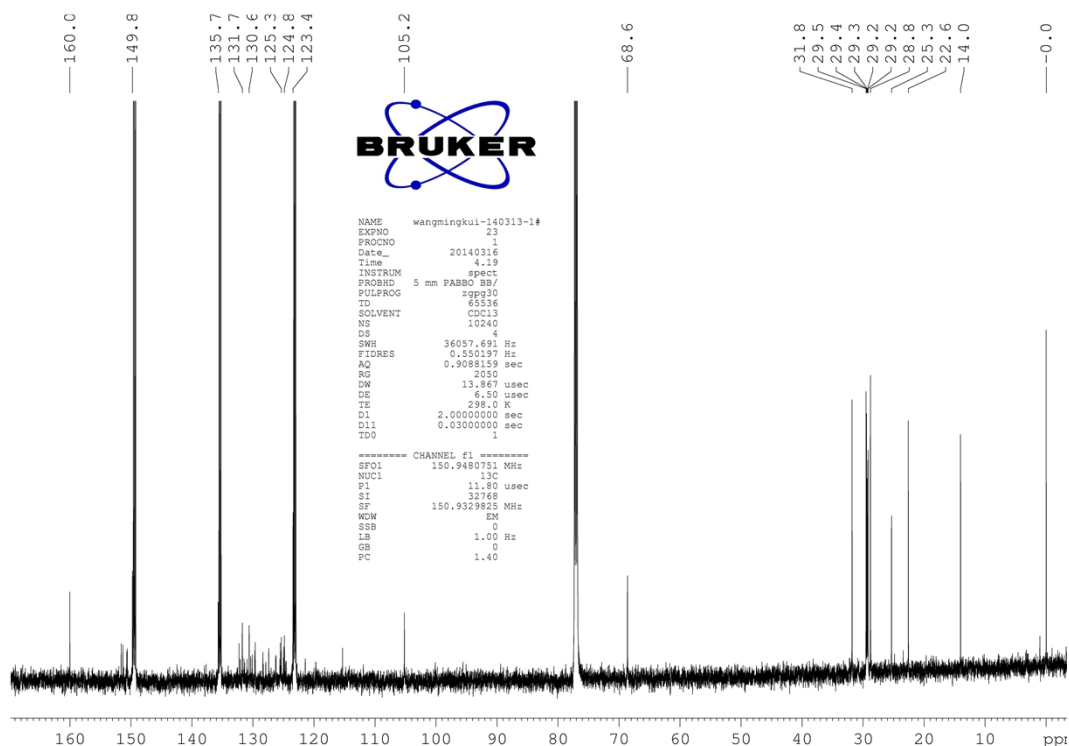

**Fig. S6.**  $^{13}\text{C}$  NMR spectrum of LW19 porphyrin (400 MHz,  $\text{CDCl}_3/\text{pyridine-d}_5$ , 298 K).

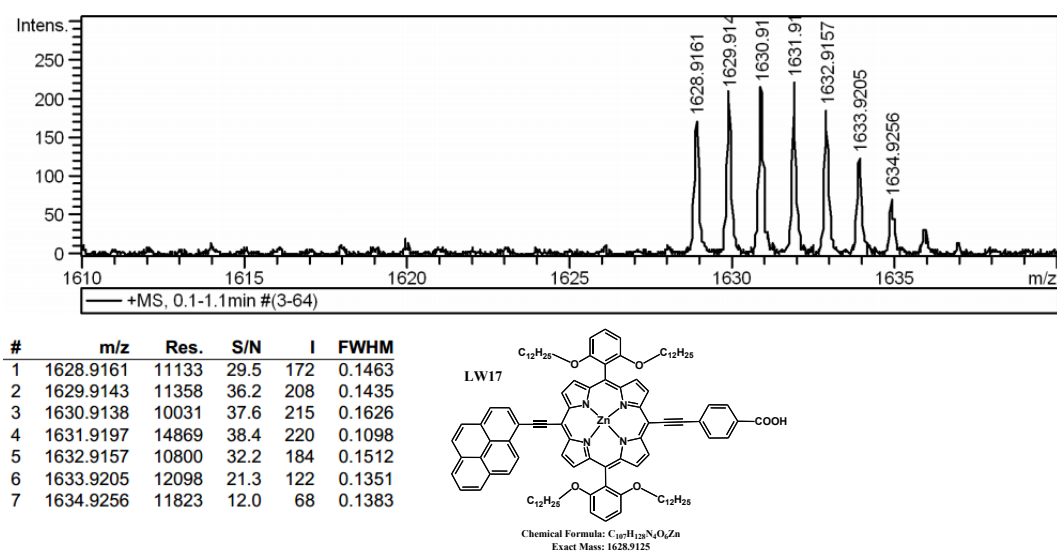

Fig. S7. HRMS of LW17 porphyrin.

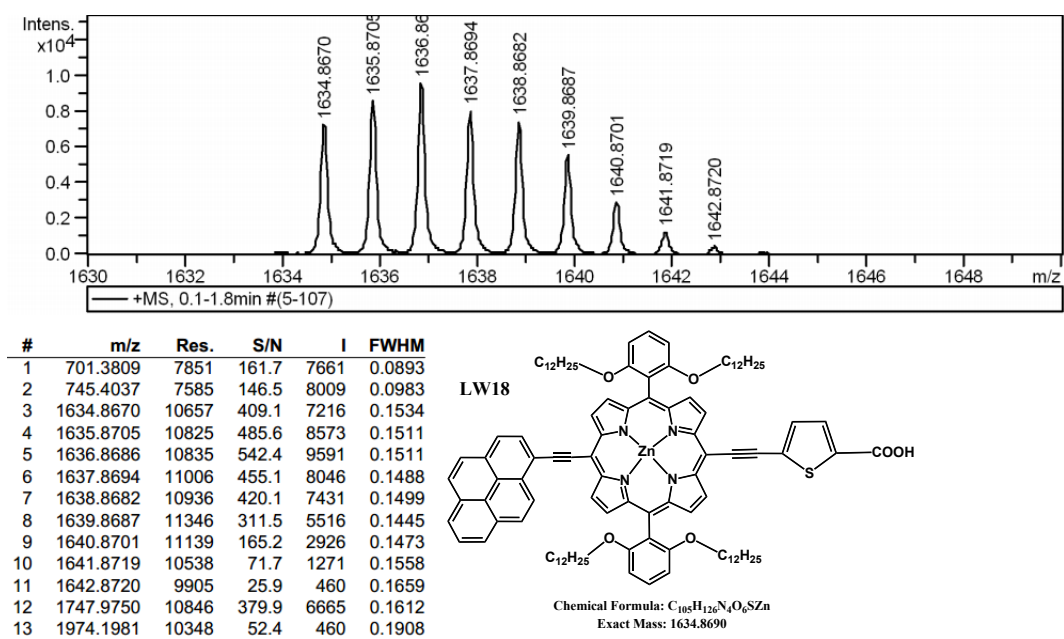

Fig. S8. HRMS of LW18 porphyrin.

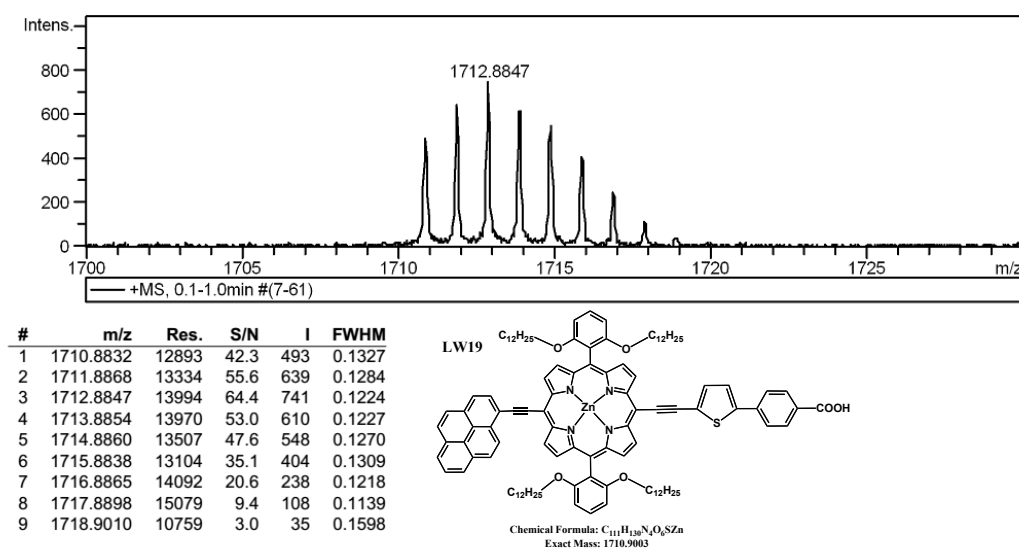

**Fig. S9.** HRMS of LW19 porphyrin.

## 2. Device fabrication

FTO glass plates (3 mm thickness, 7  $\Omega$ /square, Nippon Sheet Glass) were cleaned in detergent solution using the ultrasonic bath for 15 min and then rinsed with deionized water and ethanol for 15 min. A 7.5  $\mu$ m thick transparent layer of 20 nm  $TiO_2$  particles was first printed on the FTO conducting glass electrode and then coated with a 5- $\mu$ m thick second layer of 400 nm light scattering anatase particles (WER2-O, Dyesol). The thickness of film was measured using a profilometer (DEKTAK, VECCO, Bruker). After treated with 40 mM aqueous  $TiCl_4$  at 70  $^{\circ}C$  for 30 min, the  $TiO_2$  film was first sintered at 500  $^{\circ}C$  for 30 min and then cooled to about 80  $^{\circ}C$  in air. The details for the preparation of the 20 nm  $TiO_2$  particles and  $TiO_2$  films have been described elsewhere.<sup>5</sup> Then the  $TiO_2$  film electrodes were dipped into a 200  $\mu$ M dye solution in a mixture of toluene and ethanol (volume ratio, 1:1) at room temperature for 3 h. After being washed with ethanol and dried by air flow, the sensitized titania electrodes were assembled with thermally platinized conductive glass electrodes. The working and counter electrodes were separated by a 25  $\mu$ m thick hot melt ring (Surlyn, DuPont) and sealed by heating. The internal space was filled with liquid electrolytes using a vacuum back filling system. The iodine based electrolyte (coded as W30) for devices was 0.1 M LiI, 0.05 M  $I_2$ , 0.6 M PMII, 0.5 M 4-tert-butylpyridine in a 15/85 (v:v) mixture of valeronitrile and acetonitrile.

## 3. Photovoltaic characterization

A 450 W xenon light source solar simulator (Oriel, model 9119) with AM 1.5G filter (Oriel, model 91192) was used to give various irradiance at the surface of the solar cell. The current-voltage characteristics of the cell under these conditions were obtained by applying external potential bias to the cell and measuring the generated photocurrent with a Keithley model 2400 digital source meter (Keithley, USA). Incident photon-to-electron conversion efficiency (IPCE) spectra were recorded with a Keithley 2400 source meter as a function of wavelength under a constant white light bias of approximately  $1 \text{ mW cm}^{-2}$  supplied by a white LED array (IQE-LIGHT-BIAS, Newport). The excitation beam comes from a 300 W xenon lamp (Oriel Co.) in combination with a Corstner 260 monochromator (Newport) and is chopped at approximately 10 Hz. The devices with the photoanode area of  $0.16 \text{ cm}^2$  were tested with a metal mask of  $0.09 \text{ cm}^2$ . The photovoltaic parameters were obtained by measuring a number of independently samples individuals.

#### **4. Transient photovoltage decay (TPD) measurements**

The determination of the interfacial charge recombination lifetime was performed by the TPD measurement and charge extraction experiments. For the transient decay measurements, a white-light bias was generated from an array of diodes. Blue light pulse diodes (0.05 s square pulse-width, 100 ns rise and fall time) that were controlled by a fast solid-state switch were used as the perturbation source. The voltage dynamics were recorded on a PC-interfaced Keithley 2602A source meter with a 500 ms response time. The perturbation light source was set to a suitably low level for the voltage-decay kinetics to be mono-exponential. By varying the intensity of white-light bias, the recombination lifetime could be estimated over a range of open-circuit voltages. The chemical capacitance of the  $\text{TiO}_2$ /electrolyte interface at  $V_{oc}$  was calculated according to  $C_\mu = \Delta Q / \Delta V$ , where  $\Delta V$  is the peak of the photovoltage transient and  $\Delta Q$  is the number of electrons injected during the red-light flash. The latter parameter was obtained by integrating a short circuit transient photocurrent that was generated from an identical red-light pulse. Before the LEDs switched to the next light intensity, a charge-extraction routine was executed to measure the electron density in the film. In the charge-extraction techniques, the LED illumination source was turned off within  $<1 \text{ } \mu\text{s}$ , whilst, simultaneously, the cell was switched from open circuit to short circuit. The resulting current, as the cell returned to  $V=0$  and  $J=0$ , was integrated to give a direct measurement of the excess charge in the film at that  $V_{oc}$  value.

## 5. Spectrum and electrochemical characterization of LW17-LW19

The UV-visible absorption spectra were observed with a PE950 spectrophotometer and Fluorescent emission spectra were obtained with a Jasco FP-6500 spectrophotometer. The TRPL decays were recorded with Edinburgh instruments (FLSP920 spectrometers). The excitation light source was a picosecond pulsed light-emitting diodes centered at 445 nm, operated at a frequency of 10 MHz. The  $\text{TiO}_2$  nanoparticles were screen-printed on quartz substrates. The substrates coated with nanoparticles were immersed 200  $\mu\text{M}$  dye solution, followed by rinsing and drying to remove the excess dye. FT-IR spectra were recorded on a Bruker VERTEX 70. Square-wave voltammograms of various dyes were measured on a CHI660C electrochemical workstation. Glassy carbon electrode was used as the working electrode a platinum wire as the counter electrode, and Ag/AgCl (2 M LiCl in EtOH) as the reference electrode.

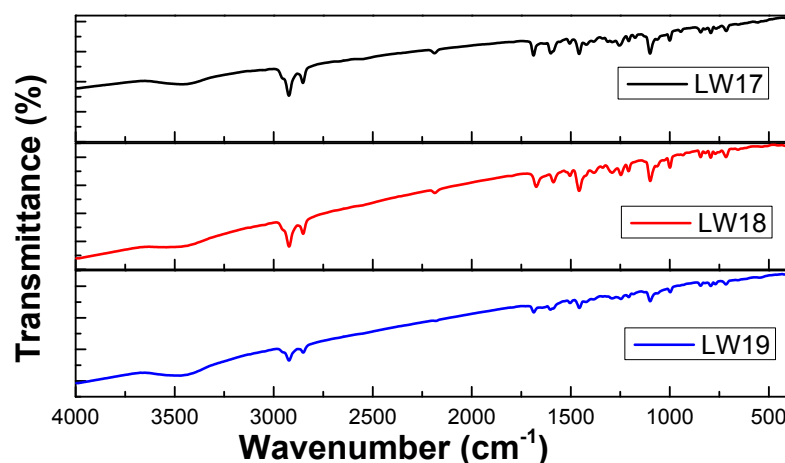

**Figure S10.** FT-IR spectra of LW17, LW18, and LW19.

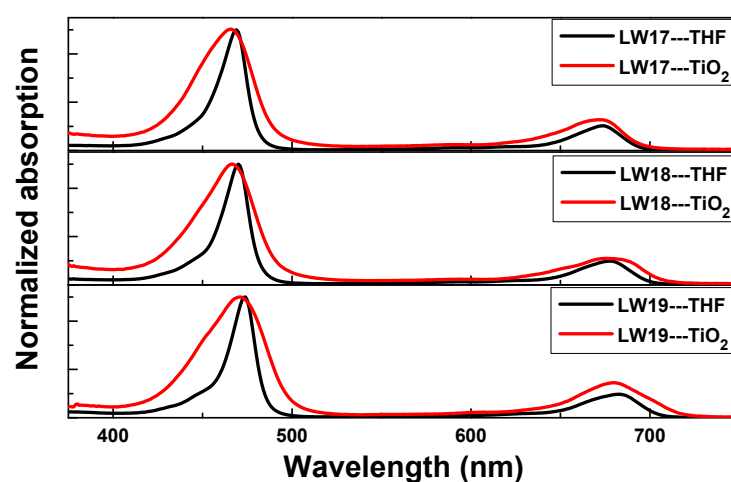

**Figure S11.** Normalized UV-visible spectra of LW17, LW18, and LW19 in THF (black curve) and on  $\text{TiO}_2$  films (transparent layers 2.3  $\mu\text{m}$  thick of 20 nm  $\text{TiO}_2$  particles) in air (red curve).

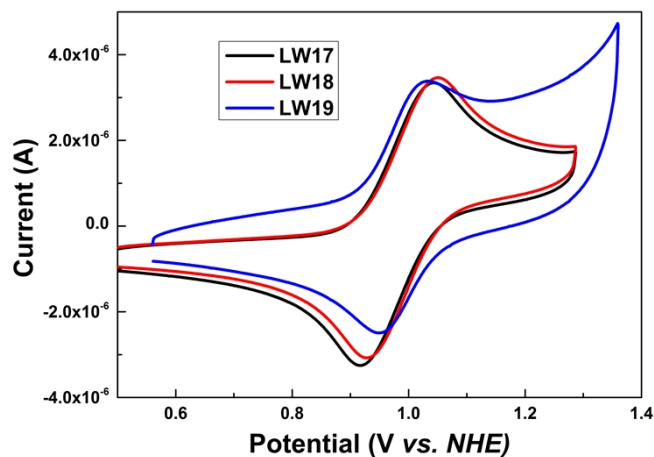

**Figure S12.** Cyclic voltammograms of Zn(II)-porphyrin dyes in THF at a scan rate of 50 mV/s at room temperature with 0.1 M tetra-n-butylammonium hexafluorophosphate (TBAPF<sub>6</sub>) as the supporting electrolyte.

## 6. The calculated energy-level diagram

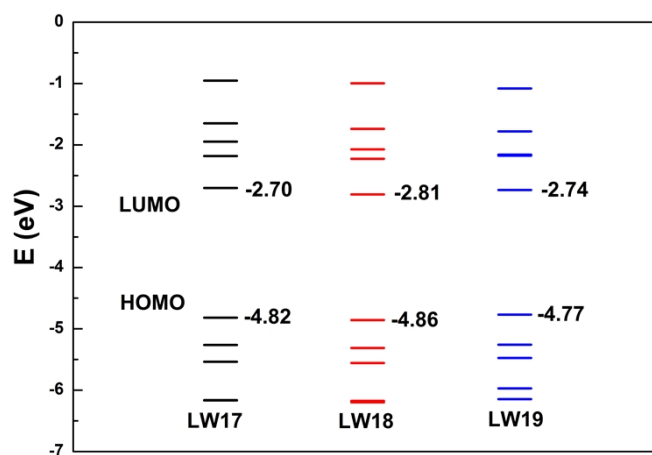

**Figure S13.** Energy-level diagram of the LW17-LW19 porphyrins by density-functional theory (DFT).

## Reference:

1. J. F. Lu, X. B. Xu, Z. H. Li, K. Cao, J. Cui, Y. B. Zhang, Y. Shen, Y. Li, J. Zhu, S. Y. Dai, W. Chen, Y. B. Cheng, M. K. Wang, *Chem. Asian J.*, 2013, **8**, 956–962.
2. J. L. Fillaut, J. Perruchon, P. Blanchard, J. Roncali, S. Golhen, M. Allain, A. Migalsaka-Zalas, I. V. Kityk, B. Sahraoui, *Organometallics*, 2005, **24**, 687–695.
3. T. Suzuki, Y. Ota, Y. Kasuya, M. Mutsuga, Y. Kawamura, H. Tsumoto, H. Nakagawa, M. G. Finn and N. Miyata, *Angew. Chem. Int. Edit.*, 2010, **49**, 6817–6820.
4. H. M. Zhan, S. Lamare, A. Ng, T. Kenny, H. Guernon, W. K. Chan, A. B. Djuricic, P. D. Harvey and W. Y. Wong, *Macromolecules*, 2011, **44**, 5155–5167.
5. C. Y. Chen, M. K. Wang, J. Y. Li, N. Pootrakulchote, L. Alibabaei, C. H. Ngoc-le, J. D. Decoppet, J. H. Tsai, C. Grätzel, C. G. Wu, S. M. Zakeeruddin, M. Grätzel, *ACS Nano*, 2009, **3**, 3103–3109
